# Supplementary material for: Physicochemical and Biological Properties of Gelatin Extracted from Marine Snail Rapana venosa
Source: MDPI journal article supplement (doi:10.3390/md17100589), 2019-10-17
Supplement: s1 [file s1]

## Supplementary Material

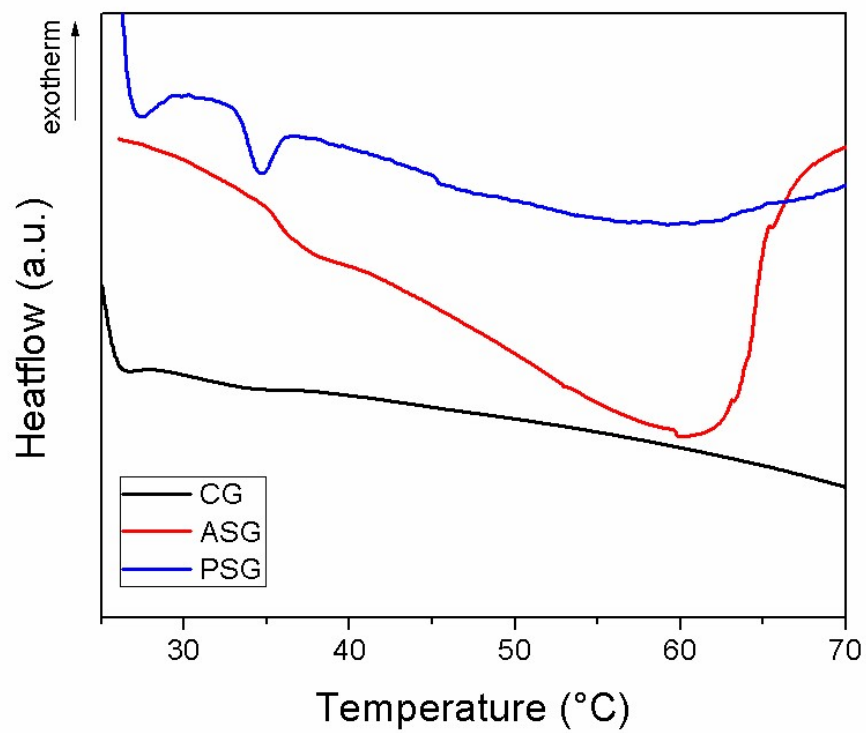

Figure S1. Thermal melting curves of ASG and PSG marine gelatins from *R. venosa* and CG from pig skin.
